# Supplementary figures and images for: Effects of zinc supplementation on diabetes mellitus: a systematic review and meta-analysis
Source: Springer Nature journal article supplement (doi:10.1186/1758-5996-4-13), 2012-04-19

(a)

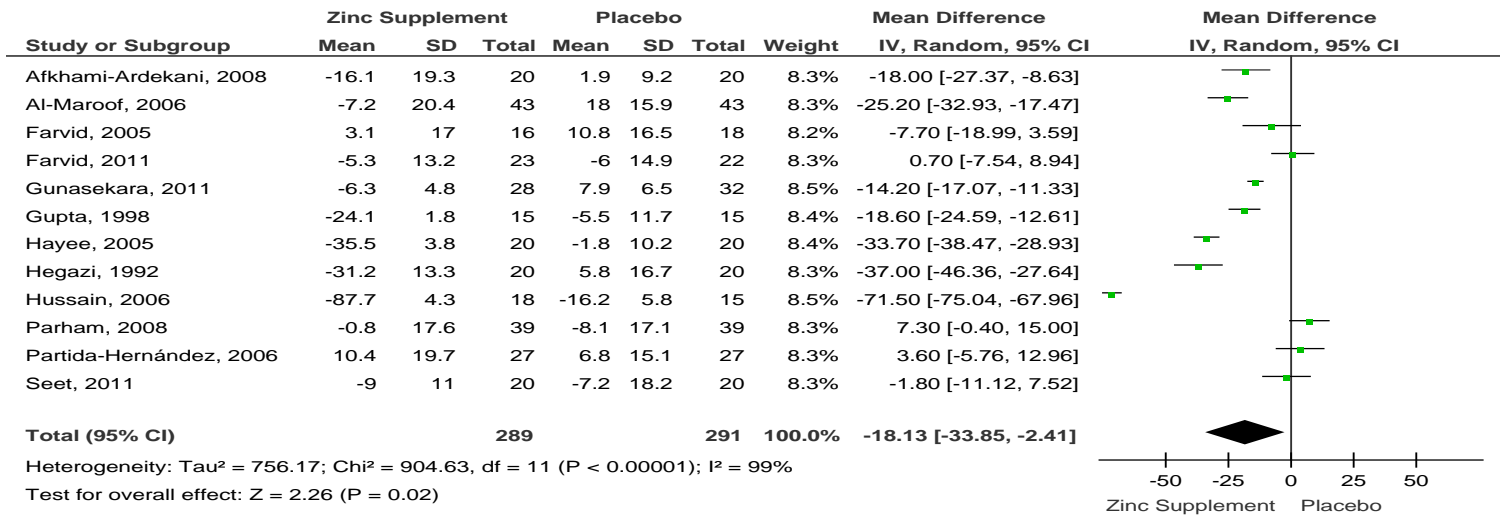

(b)

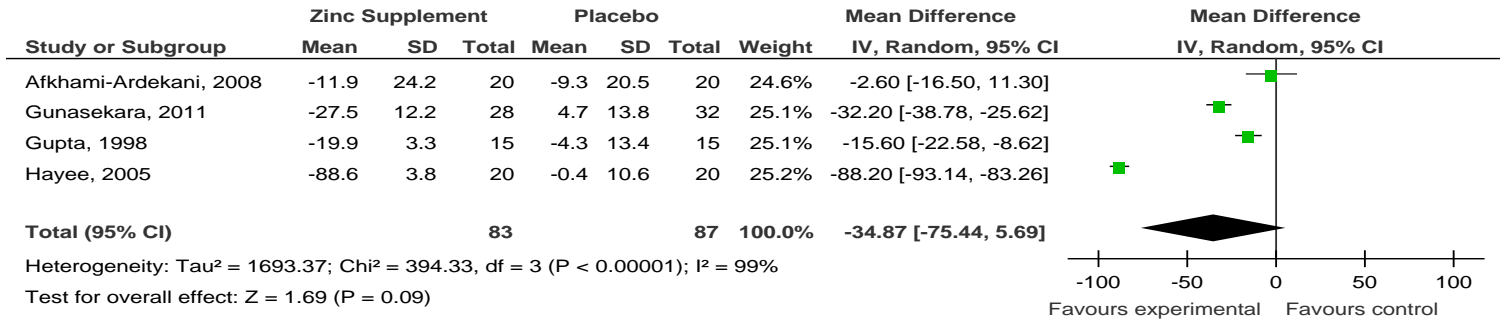

(c)

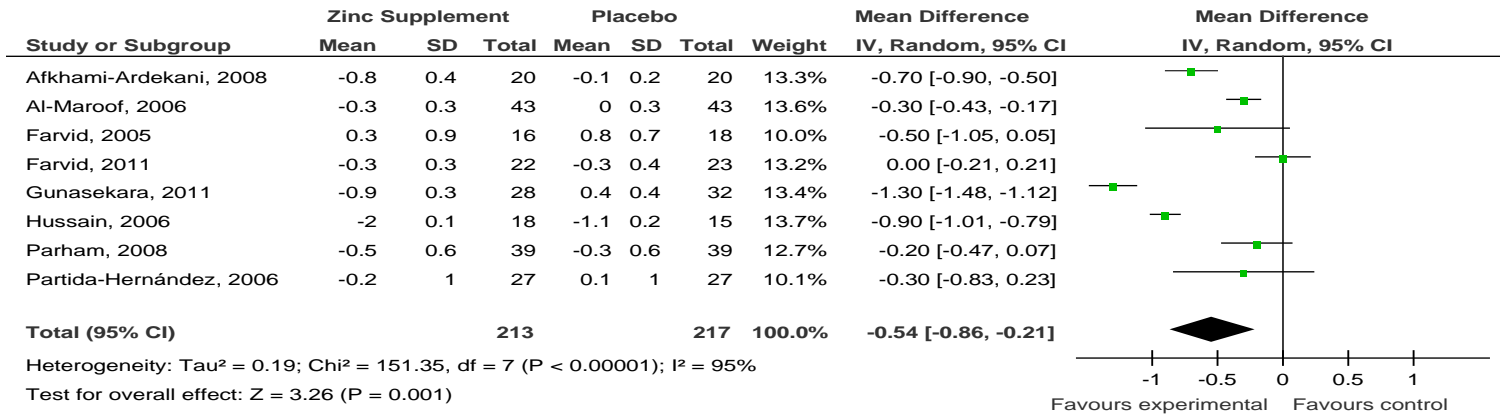

Supplement: 13098_2012_153_MOESM4_ESM.pdf [file 13098_2012_153_MOESM4_ESM.pdf]
